# Supplementary material
Source: Springer Nature journal article supplement (https://www.springermedizin.de/resource/supplementary/12936_2011_2042_MOESM2_ESM.pdf/9543038)

**P0002**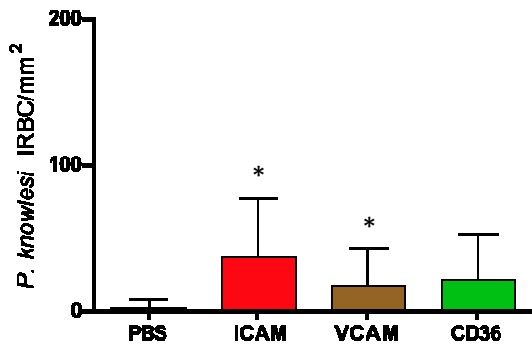**P0006**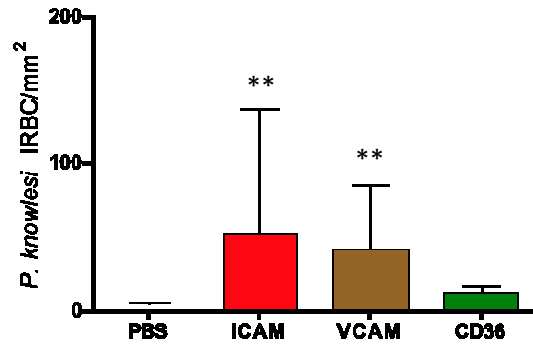**P0009**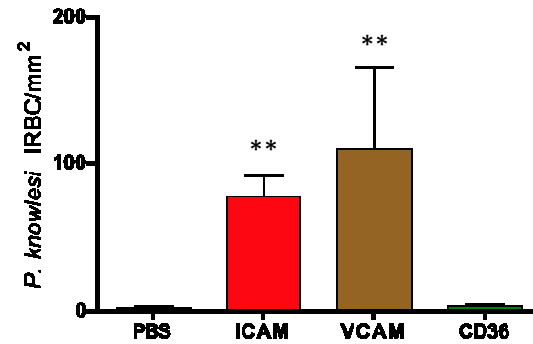**P0010**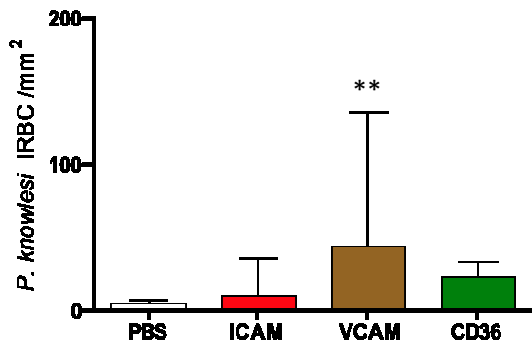**P0011**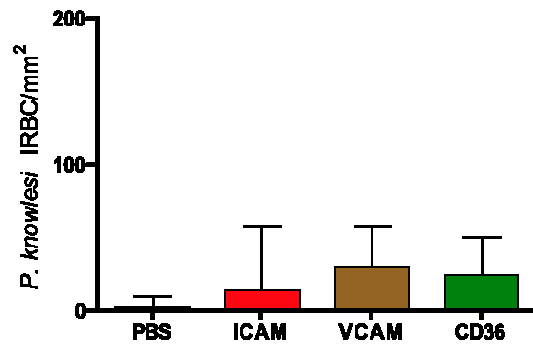**Clone HB3**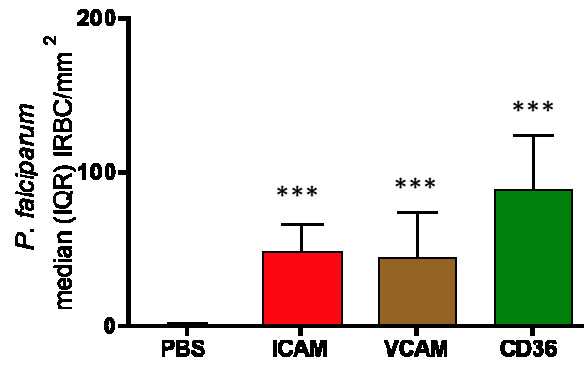

Supplement: MOESM2 [file 9543038]
